# Supplementary material
Source: publisher site journal article supplement (https://www.dovepress.com/article/325851)
Supplement: Supplementary file 1 [file get_supplementary_file.php]

**Supplementary Table 1: Common types of mobile health apps used by the participants**

| <b>Category</b>                       | <b>Mobile Health App</b> | <b>Total Number</b> | <b>Percentage</b> |
|---------------------------------------|--------------------------|---------------------|-------------------|
| General Health App<br>(Multi-purpose) | Apple Health             | 79                  | 28.42             |
|                                       | Huawei Health            | 63                  | 22.66             |
|                                       | Samsung Health           | 7                   | 2.52              |
| Fitness App                           | Healthify Me             | 9                   | 3.24              |
|                                       | Fabulous                 | 2                   | 0.72              |
|                                       | Seven                    | 1                   | 0.36              |
|                                       | Verv                     | 4                   | 1.44              |
|                                       | Weight Loss Fitness      | 2                   | 0.72              |
|                                       | Pacer                    | 11                  | 3.96              |
|                                       | 30 Day Fitness           | 9                   | 3.24              |
|                                       | Strava                   | 10                  | 3.60              |
|                                       | Fitbit                   | 10                  | 3.60              |
|                                       | My Fitness Pal           | 12                  | 4.32              |
|                                       | Workout for Women        | 1                   | 0.36              |
|                                       | ABS Workout              | 1                   | 0.36              |
|                                       | Losing Weight in 30 Days | 1                   | 0.36              |
|                                       | Google Fit               | 4                   | 1.44              |
|                                       | Jefit                    | 1                   | 0.36              |
|                                       | Biibt                    | 1                   | 0.36              |
|                                       | Nike Run Club            | 4                   | 1.44              |
|                                       | WE Chat                  | 1                   | 0.36              |
|                                       | Nike Run                 | 1                   | 0.36              |
|                                       | MiFit                    | 1                   | 0.36              |
| Piit Pocket                           | 1                        | 0.36                |                   |

|                   |                           |     |      |
|-------------------|---------------------------|-----|------|
| Fitness app       | Vitality Weekly           | 1   | 0.36 |
|                   | Calorie Tracker           | 1   | 0.36 |
|                   | Home Workout              | 1   | 0.36 |
|                   | Daily Yoga                | 1   | 0.36 |
|                   | Run Keeper                | 1   | 0.36 |
|                   | Swift Tabata              | 1   | 0.36 |
|                   | CLIPTRAC                  | 1   | 0.36 |
|                   | Get Fit                   | 1   | 0.36 |
|                   | Freelerics                | 1   | 0.36 |
|                   | 30-day Fitness Challenges | 1   | 0.36 |
|                   | Galaxy Wearable           | 1   | 0.36 |
|                   | Huawer Mate 10 app        | 1   | 0.36 |
|                   | Endomondo                 | 4   | 1.44 |
|                   | Period Tracker            | FLO | 3    |
| P.C               |                           | 9   | 3.24 |
| Clue              |                           | 3   | 1.08 |
| Meditation        | Headspace                 | 2   | 0.72 |
|                   | Calm                      | 2   | 0.72 |
|                   | Thunderspace              | 1   | 0.36 |
| Health Monitoring | Heartrate Free            | 1   | 0.36 |
|                   | Sugar Sense               | 1   | 0.36 |
|                   | Clip Trac                 | 1   | 0.36 |
| Others            | Doctor 2u                 | 1   | 0.36 |
|                   | MIMS                      | 2   | 0.72 |
| Total             | 48                        | 278 | 100  |
